# Supplementary material for: Trichosanthis Pericarpium Aqueous Extract Protects H9c2 Cardiomyocytes from Hypoxia/Reoxygenation Injury by Regulating PI3K/Akt/NO Pathway
Source: MDPI journal article supplement (doi:10.3390/molecules23102409), 2018-09-20
Supplement: s2 [file s2]

## Supplementary Materials

### Trichosanthis Pericarpium Aqueous Extract Protects H9c2 Cardiomyocytes from Hypoxia/Reoxygenation Injury by Regulating PI3K/Akt/NO Pathway

Donghai Chu <sup>1,2</sup>, and Zhenqiu Zhang <sup>1,\*</sup>

<sup>1</sup> Liaoning University of Traditional Chinese Medicine, NO. 77 Shengming 1st Road, Dalian 11600, Liaoning, China; chubotany@sina.cn (D.C.)

<sup>2</sup> Liaoning Institute of Science and Technology, NO.76 Xianghuai Road, Benxi 117004, Liaoning, China

\* Correspondence: zhangzhenqiu@sina.com; Tel.: +86-411-8589-0199

#### Content:

|                                                                                                  |   |
|--------------------------------------------------------------------------------------------------|---|
| Table S1 The analytical condition for gradient elution of mobile phases.....                     | 2 |
| Table S2 Interactive similarities of TP from different origins. ....                             | 2 |
| Figure S1. The chromatogram of TP samples and the generated reference standard fingerprint. .... | 3 |
| Table S3 Contents of total flavones in TP from different origins. ....                           | 3 |

**Table S1 The analytical condition for gradient elution of mobile phases.**

| Time (min) | Mobile phase A | Mobile phase B |
|------------|----------------|----------------|
| 0          | 13.5           | 86.5           |
| 30         | 16.5           | 83.5           |
| 40         | 19.5           | 80.5           |
| 50         | 23.0           | 77.0           |
| 60         | 35.0           | 65.0           |
| 80         | 40.0           | 60.0           |

Notes: Mobile phase A: methanol mixed with acetonitrile at a volume ratio of 1:10; Mobile phase B: 0.1% phosphate aqueous solution. HPLC fingerprints were performed on an Agilent 1100 series HPLC system. The chromatographic separation was carried out on a Cosmosil MS-II C18 column (250 mm×4.6 mm, 5 µm), operated at 25°C. The analytical condition was set as shown in Table 1. The flow rate was 1.0 mL / min and the detection wavelength was set at 360 nm with the sample injection volume of 20 µL.

**Table S2 Interactive similarities of TP from different origins.**

| Sample number        | S <sub>1</sub> | S <sub>2</sub> | S <sub>3</sub> | S <sub>4</sub> | S <sub>5</sub> | S <sub>6</sub> | S <sub>7</sub> | S <sub>8</sub> | Standard fingerprint |
|----------------------|----------------|----------------|----------------|----------------|----------------|----------------|----------------|----------------|----------------------|
| S <sub>1</sub>       | 1              | 0.97           | 0.993          | 0.956          | 0.974          | 0.987          | 0.981          | 0.959          | 0.996                |
| S <sub>2</sub>       | 0.97           | 1              | 0.967          | 0.926          | 0.949          | 0.965          | 0.958          | 0.942          | 0.974                |
| S <sub>3</sub>       | 0.993          | 0.967          | 1              | 0.933          | 0.971          | 0.996          | 0.991          | 0.98           | 0.997                |
| S <sub>4</sub>       | 0.956          | 0.926          | 0.933          | 1              | 0.925          | 0.91           | 0.912          | 0.882          | 0.941                |
| S <sub>5</sub>       | 0.974          | 0.949          | 0.971          | 0.925          | 1              | 0.973          | 0.975          | 0.954          | 0.978                |
| S <sub>6</sub>       | 0.987          | 0.965          | 0.996          | 0.91           | 0.973          | 1              | 0.993          | 0.982          | 0.995                |
| S <sub>7</sub>       | 0.981          | 0.958          | 0.991          | 0.912          | 0.975          | 0.993          | 1              | 0.983          | 0.992                |
| S <sub>8</sub>       | 0.959          | 0.942          | 0.98           | 0.882          | 0.954          | 0.982          | 0.983          | 1              | 0.975                |
| Standard fingerprint | 0.996          | 0.974          | 0.997          | 0.941          | 0.978          | 0.995          | 0.992          | 0.975          | 1                    |

Notes: (S<sub>1</sub>: Hebei Province, S<sub>2</sub>: Sichuan Province, S<sub>3</sub>: Guizhou Province, S<sub>4</sub>: Yunnan Province, S<sub>5</sub>: Henan Province, S<sub>6</sub>: Shandong Province, S<sub>7</sub>: Shanxi Province, S<sub>8</sub>: Anhui Province)

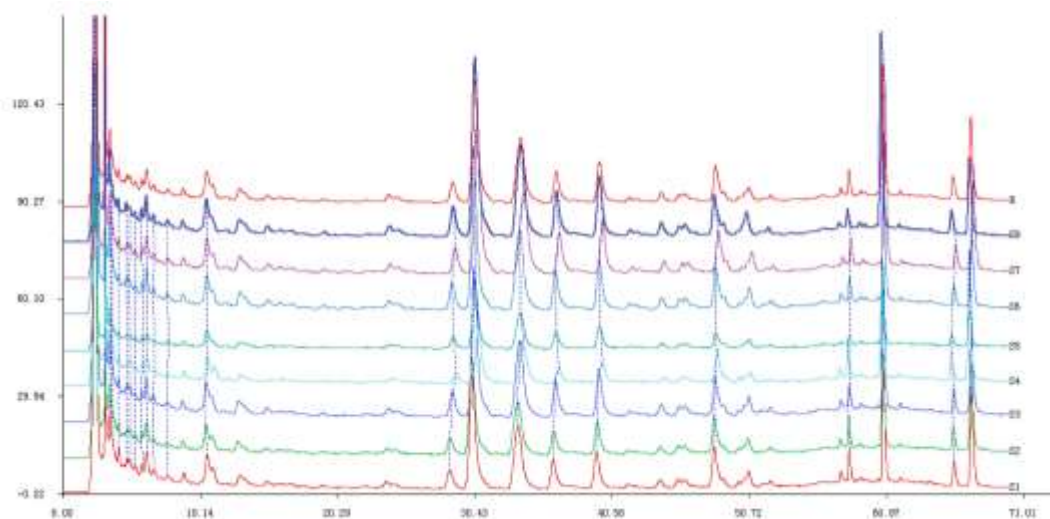

**Figure S1. The chromatogram of TP samples and the generated reference standard fingerprint.**

Note: S<sub>1</sub>-S<sub>8</sub>: fingerprints of 8 batches of TP samples from different origins; R: reference standard fingerprint created by Similarity evaluation system for chromatographic fingerprint of traditional Chinese Medicine, version 2004 A.

**Table S3 Contents of total flavones in TP from different origins.**

| Sample number  | Contents of total flavones(mg/g) | Mean (mg/g) | RSD   |
|----------------|----------------------------------|-------------|-------|
| S <sub>1</sub> | 5.829                            | 6.128       | 2.96% |
| S <sub>2</sub> | 5.989                            |             |       |
| S <sub>3</sub> | 6.014                            |             |       |
| S <sub>4</sub> | 6.126                            |             |       |
| S <sub>5</sub> | 6.296                            |             |       |
| S <sub>6</sub> | 6.365                            |             |       |
| S <sub>7</sub> | 6.125                            |             |       |
| S <sub>8</sub> | 6.282                            |             |       |
